# Supplementary material for: Multiple wheat genomes reveal global variation in modern breeding
Source: Springer Nature journal article supplement (doi:10.1038/s41586-020-2961-x), 2020-11-25
Supplement: 41586_2020_2961_MOESM1_ESM.pdf [file 41586_2020_2961_MOESM1_ESM.pdf]

**Supplementary information**

---

**Multiple wheat genomes reveal global variation in modern breeding**

---

In the format provided by the authors and unedited

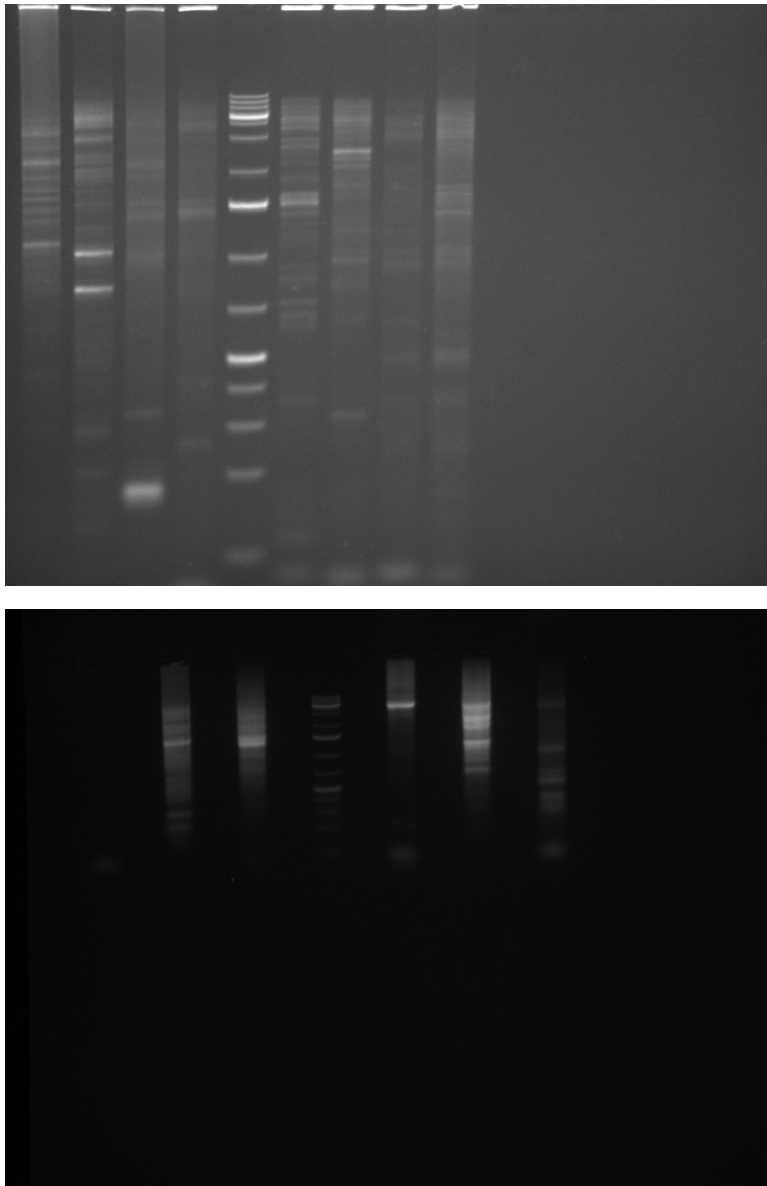

**Supplementary Figure 1 | Original gel source data used for spanning the breakpoint for the 7B/5B translocation.** Images were cropped and used in the construction of Extended Data Figure 9. A DNA ladder is included in the middle of each image for approximating the size of the amplicons.
